# Supplementary material for: Periplasmic Flagellar Export Apparatus Protein, FliH, Is Involved in Post-Transcriptional Regulation of FlaB, Motility and Virulence of the Relapsing Fever Spirochete Borrelia hermsii
Source: PubMed Central journal article supplement (PMC3757020; doi:10.1371/journal.pone.0072550), 2013-08-29

**A**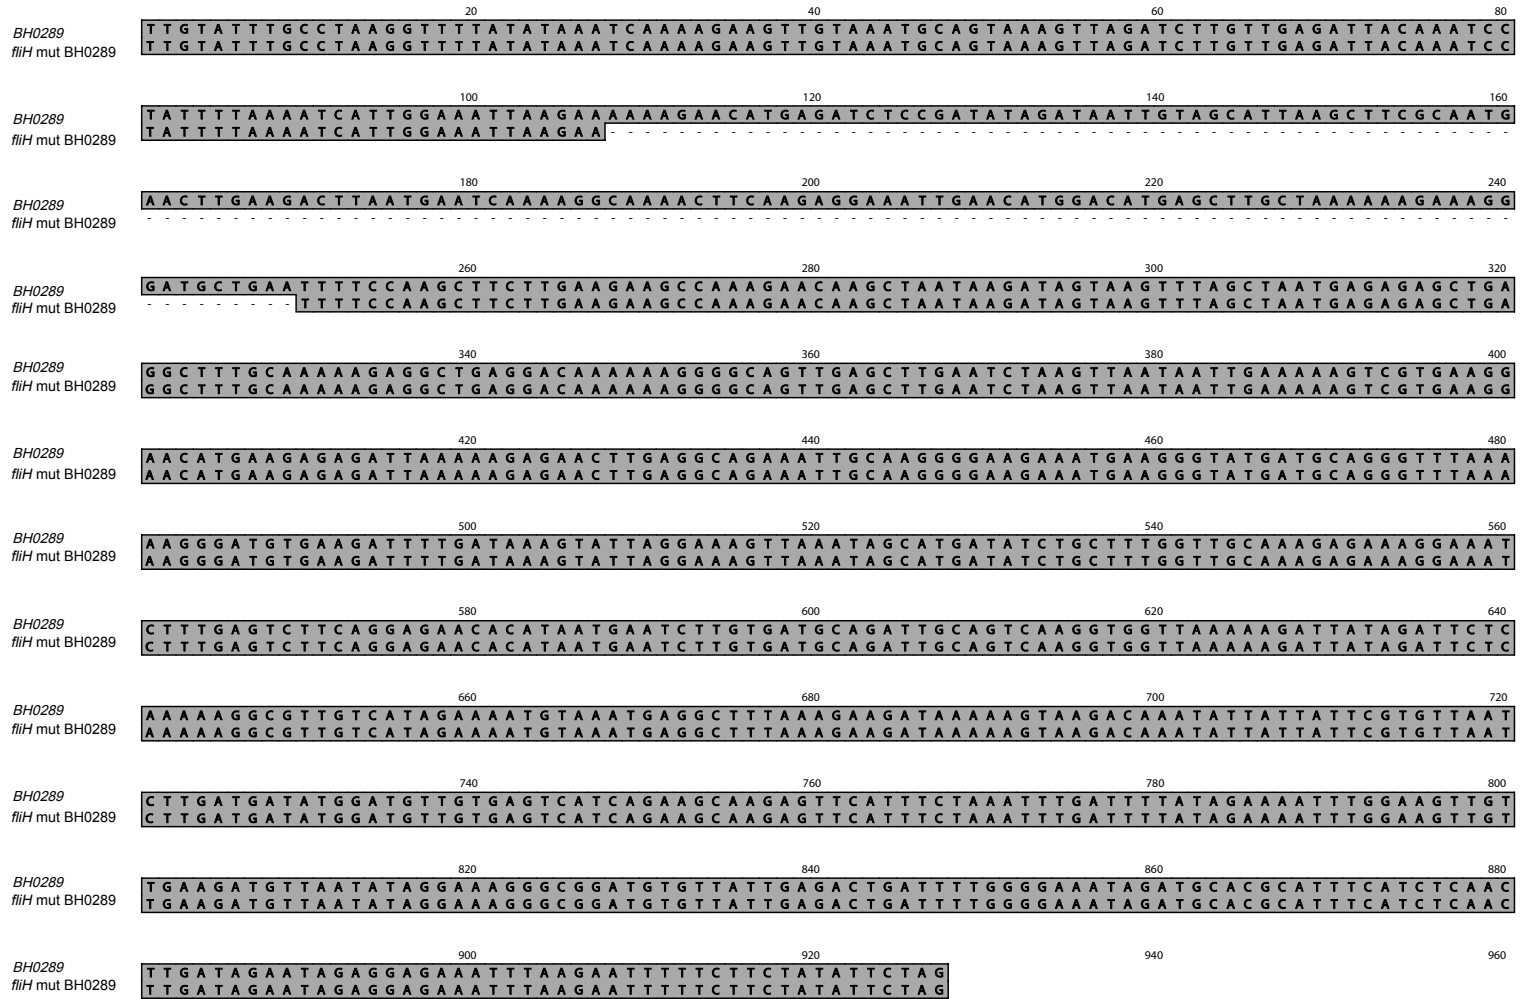**B**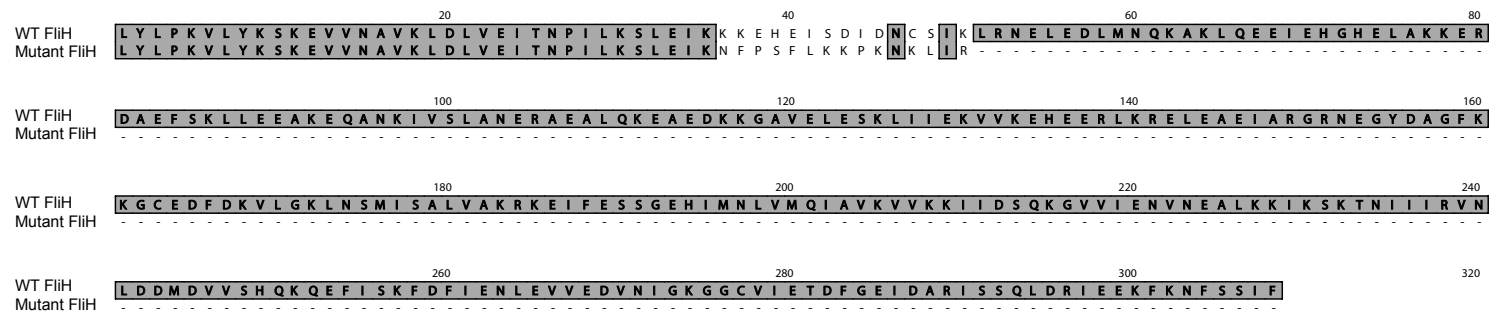

Supplement: pone.0072550.s001.pdf [file pone.0072550.s001.pdf]
